# Supplementary material for: Host dependent electrocatalytic hydrogen evolution of Ni/TiO2 composites
Source: Royal Society of Chemistry journal article supplement (doi:10.1039/d0ta09604k), 2021-01-01
Supplement: d0ta09604k1.pdf [file d0ta09604k1.pdf]

## **Host dependent electrocatalytic hydrogen evolution of Ni/TiO<sub>2</sub> composite**

Peng Zhou,<sup>a</sup> Shuhua Wang,<sup>b</sup> Guangyao Zhai,<sup>a</sup> Xingshuai Lv,<sup>b</sup> Yuanyuan Liu,<sup>\*a</sup> Zeyan Wang,<sup>a</sup> Peng Wang,<sup>a</sup> Zhaoke Zheng,<sup>a</sup> Hefeng Cheng,<sup>a</sup> Ying Dai,<sup>b</sup> and Baibiao Huang<sup>\*a</sup>

<sup>a</sup>State Key Laboratory of Crystal Materials, Shandong University, Jinan 250100, China.

<sup>b</sup>School of Physics, Shandong University, Jinan 250100, China.

† \*Email: [yylu@sdu.edu.cn](mailto:yylu@sdu.edu.cn); \*Email: [bbhuang@sdu.edu.cn](mailto:bbhuang@sdu.edu.cn)

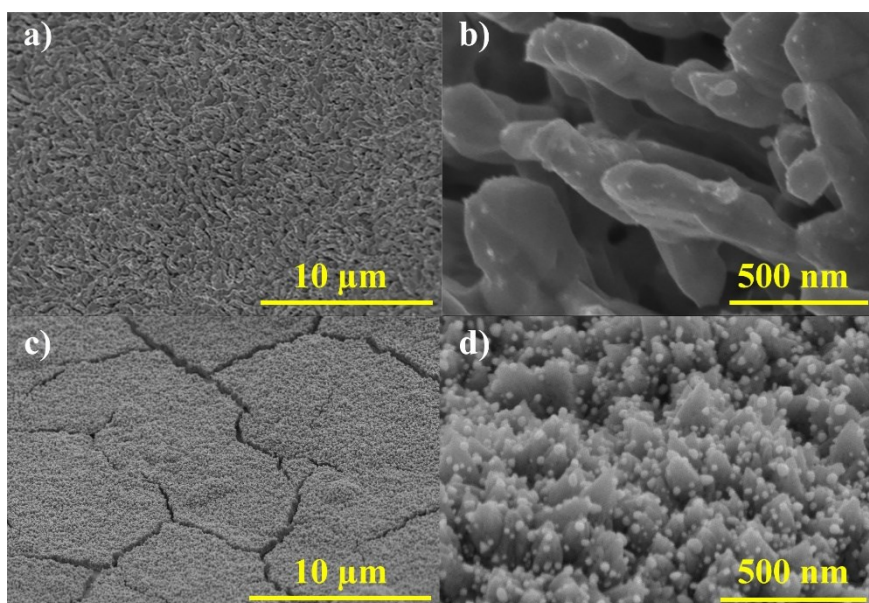

**Figure S1.** The SEM images of Ni (a, b) and Ni/TiO<sub>2</sub>-form-A-S (c, d) samples.

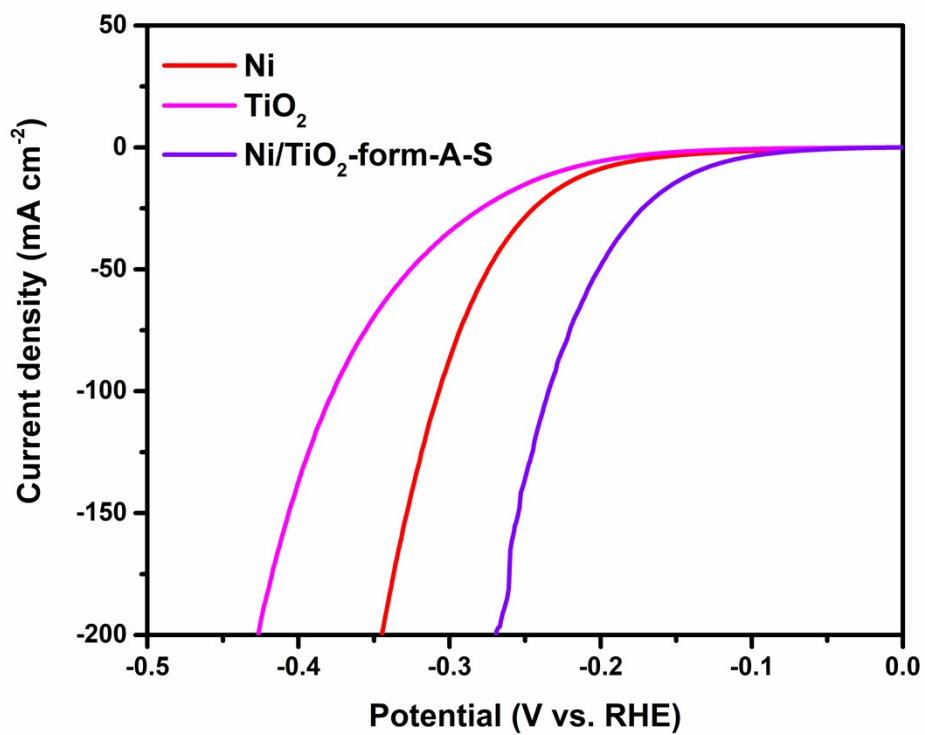

**Figure S2.** The LSV curves of Ni, Ni/TiO<sub>2</sub>-form-A-S and TiO<sub>2</sub> samples.

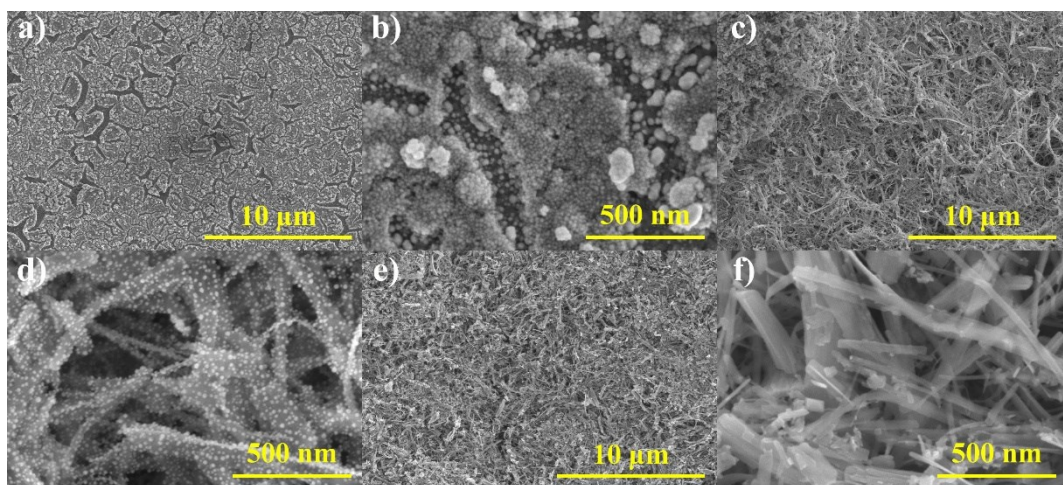

**Figure S3.** The SEM images of Ni-Ti foil (a, b), Ni/TiO<sub>2</sub>-form-B-S (c, d) and TiO<sub>2</sub>-Ti foil (e, f) samples.

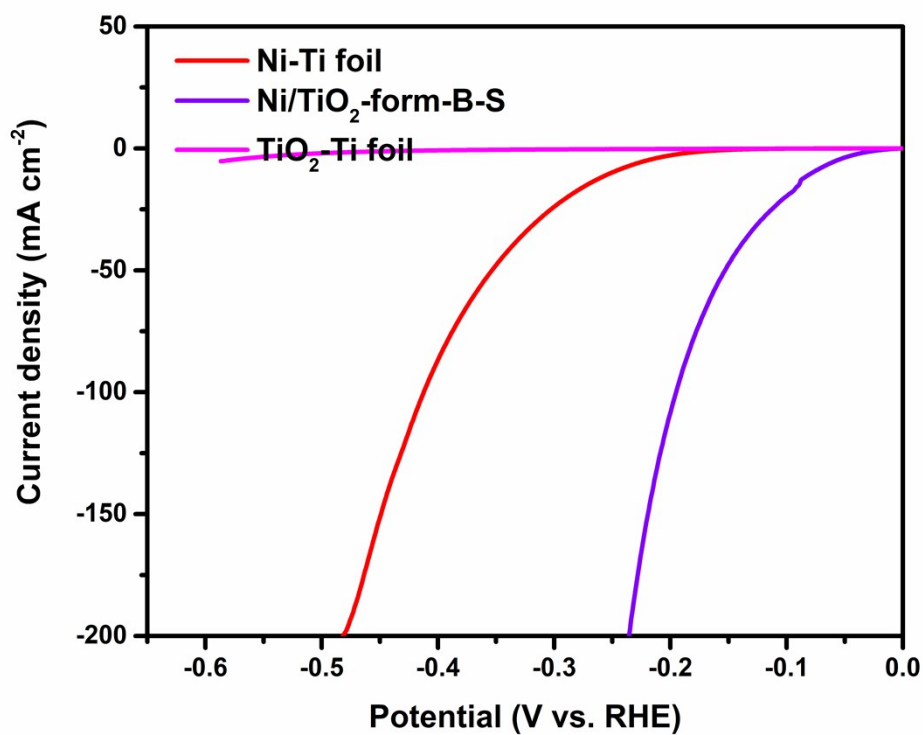

**Figure S4.** The LSV curves of Ni-Ti foil, Ni/TiO<sub>2</sub>-form-B-S and TiO<sub>2</sub>-Ti foil samples.

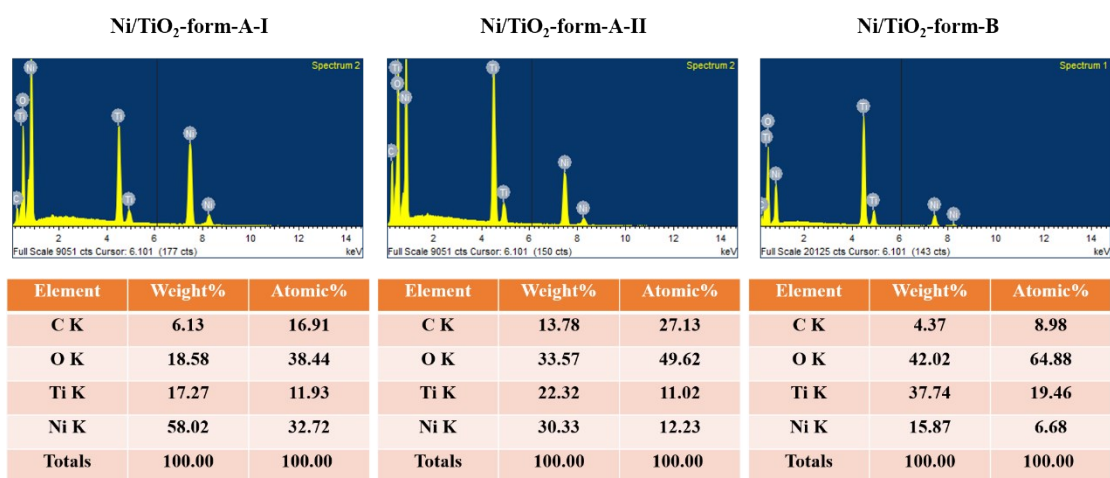

**Figure S5.** The EDS spectra of different Ni/TiO<sub>2</sub> samples.

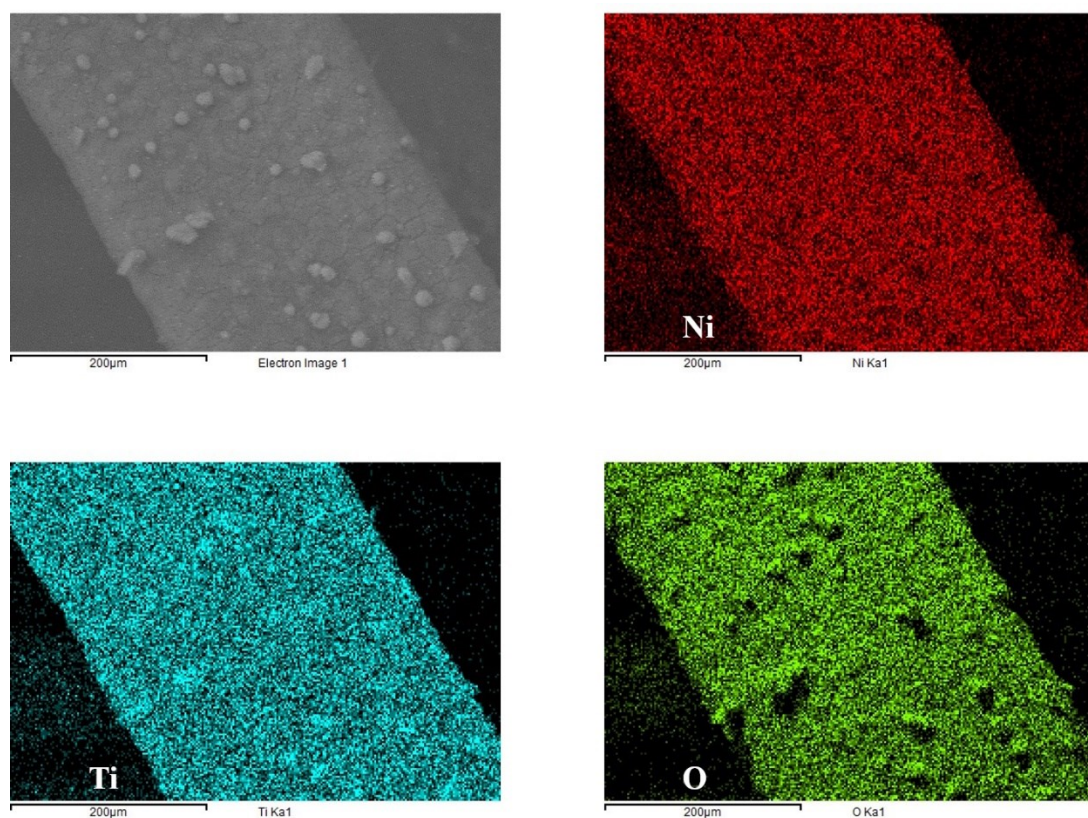

**Figure S6.** SEM-EDS Mapping images of Ni, Ti and O elements in Ni/TiO<sub>2</sub>-form-A-II sample.



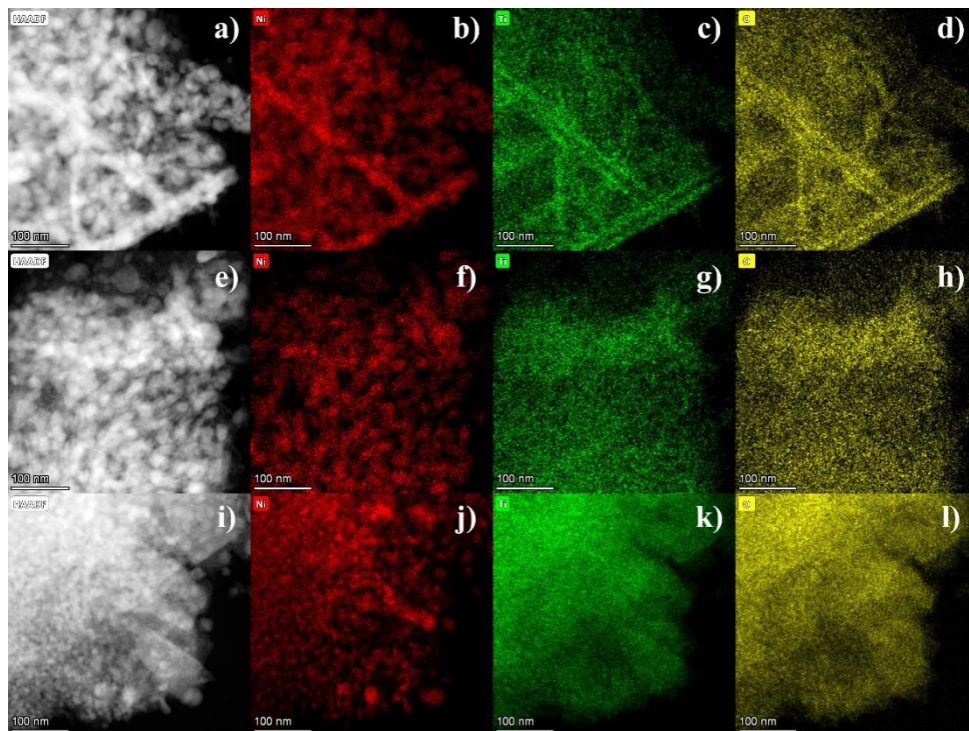

**Figure S7.** TEM-EDS Mapping images of Ni/TiO<sub>2</sub>-form-A-I (a-d), Ni/TiO<sub>2</sub>-form-A-II (e-h) and Ni/TiO<sub>2</sub>-form-B (i-l).

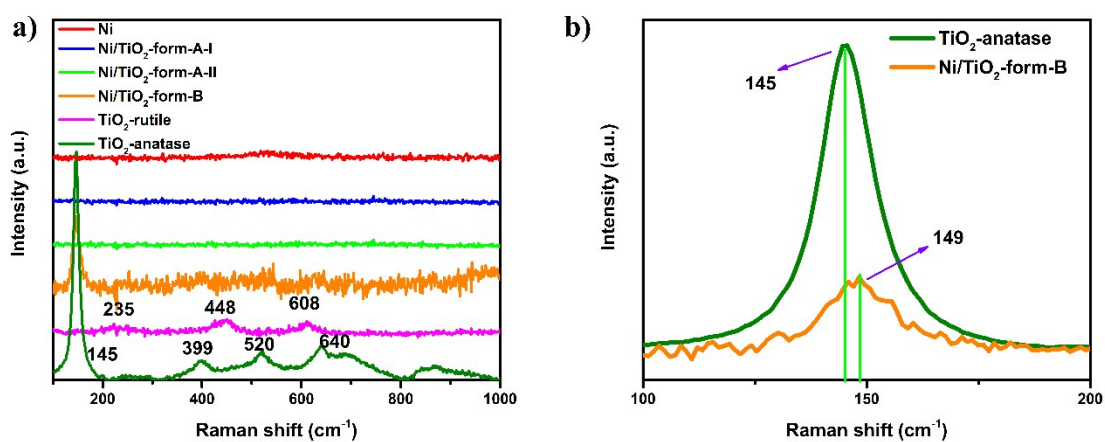

**Figure S8.** Raman spectra of Ni, TiO<sub>2</sub> with different crystal forms and Ni/TiO<sub>2</sub> samples with different combination forms.

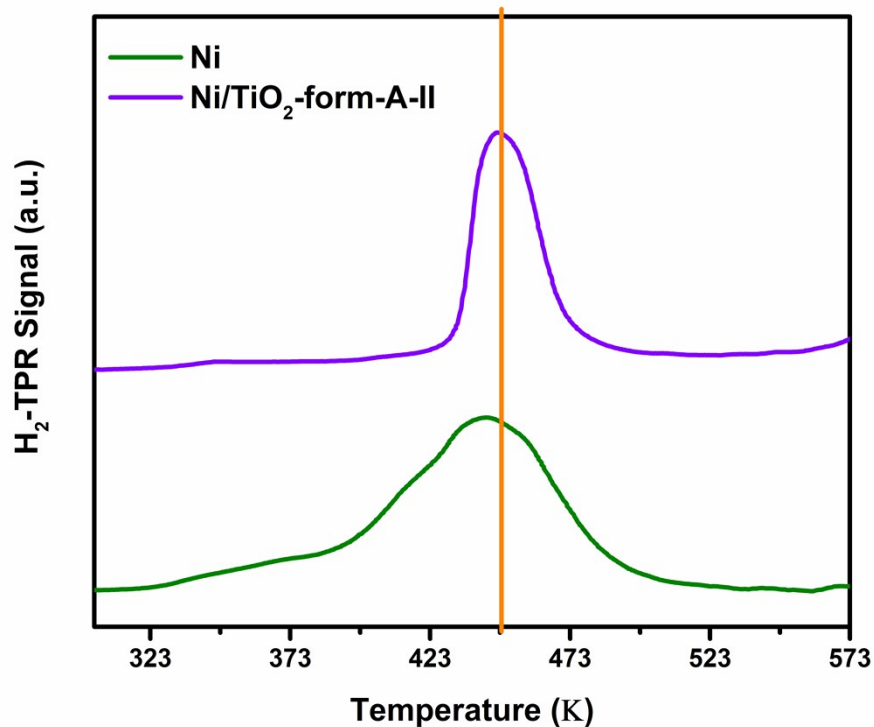

**Figure S9.** The H<sub>2</sub>-TPR spectrum of Ni and Ni/TiO<sub>2</sub>-form-A-II samples.

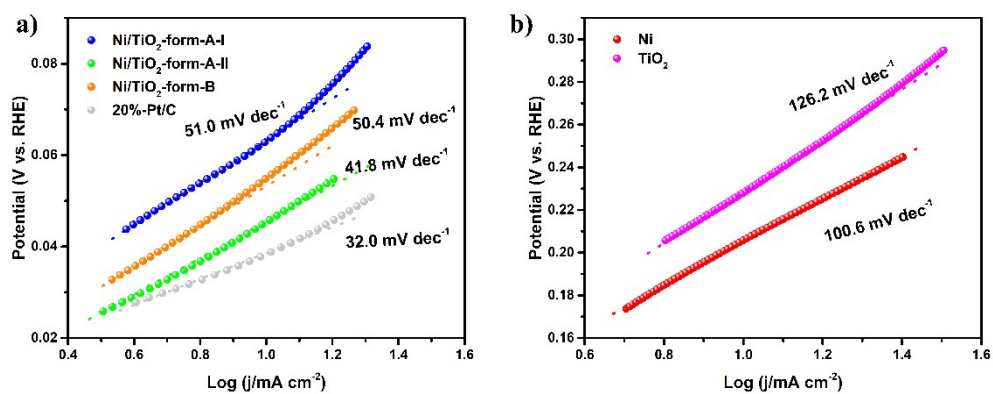

**Figure S10.** Tafel slope values of Pt/C, Ni, TiO<sub>2</sub> and Ni/TiO<sub>2</sub> samples with different forms in 1M KOH solution.

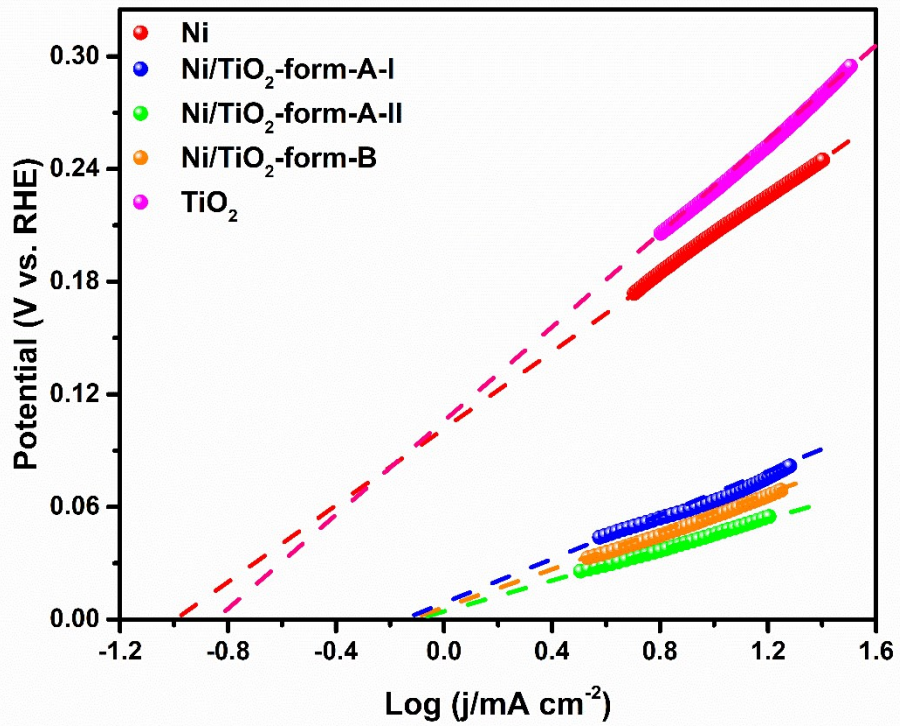

**Figure S11.** The exchange current density spectrum of Ni, different Ni/TiO<sub>2</sub> and TiO<sub>2</sub> samples derived from Tafel curves.

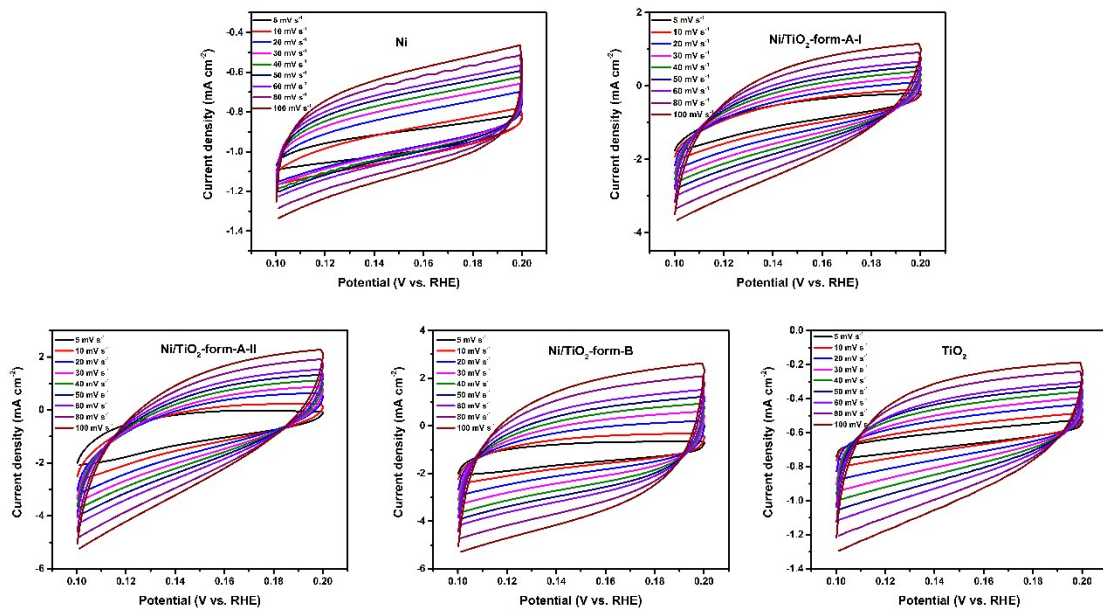

**Figure S12.** The electrical double-layer capacitance curves (which is proportion to electrochemical surface area (ECSA), vs. RHE) of Ni, different Ni/TiO<sub>2</sub> and TiO<sub>2</sub> samples.

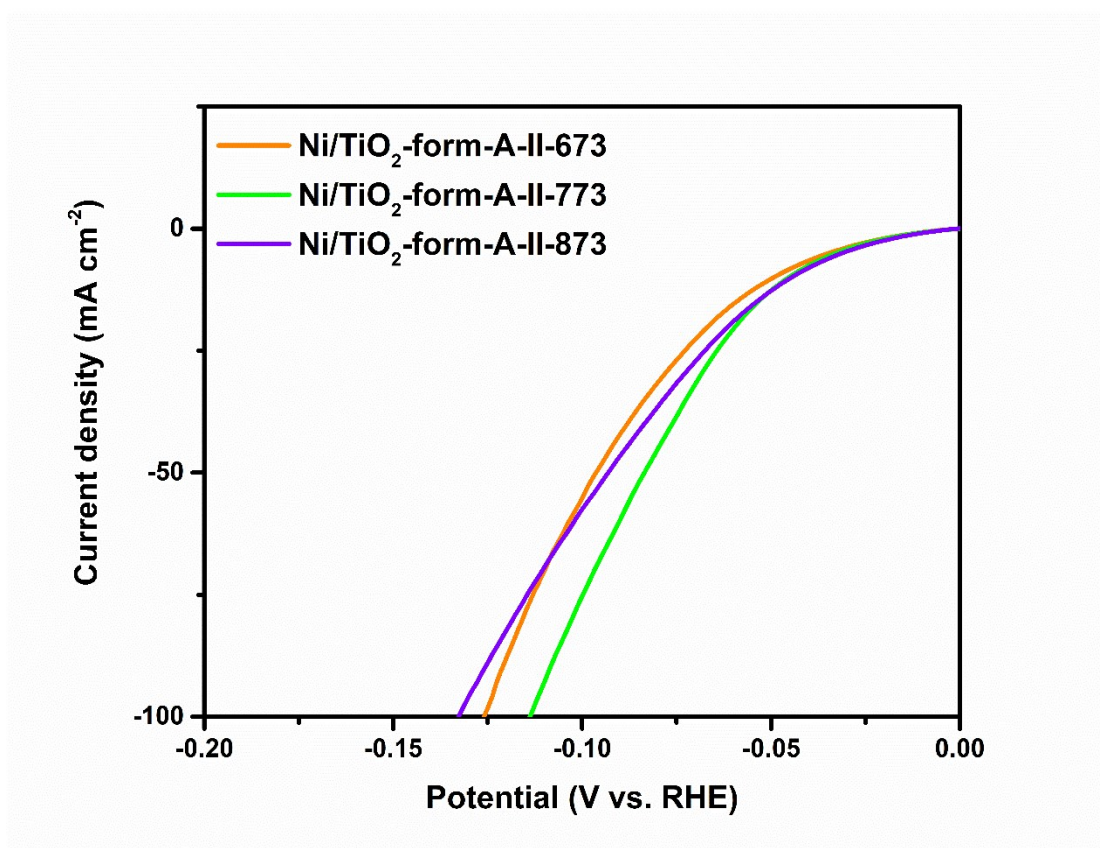

**Figure S13.** The LSV curves of Ni/TiO<sub>2</sub>-form-A-II samples with different synthesized temperatures.



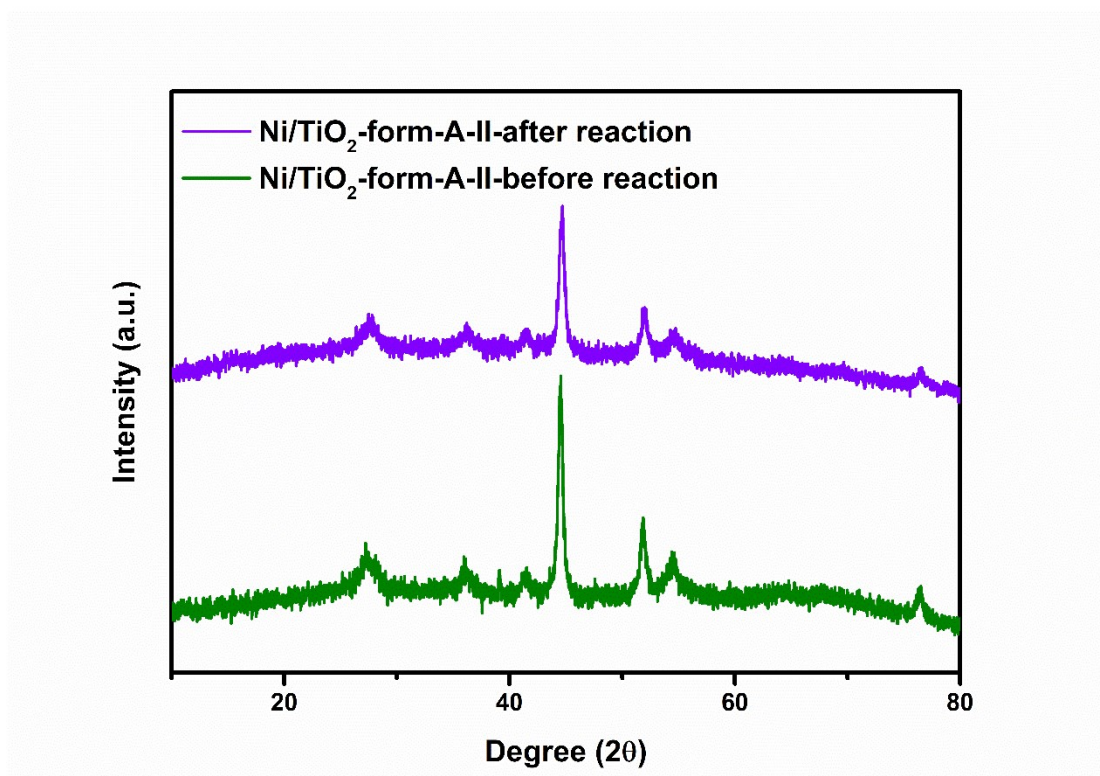

**Figure S14.** The XRD spectra of Ni/TiO<sub>2</sub>-form-A-II samples before and after reaction.

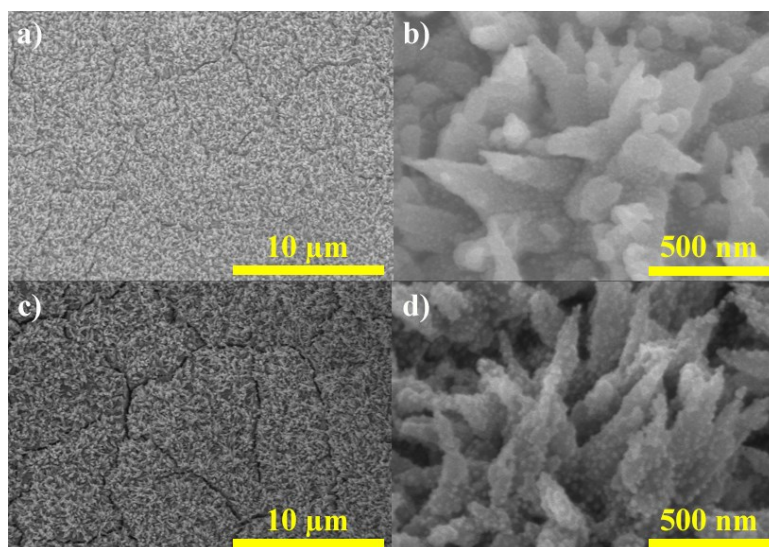

**Figure S15.** The SEM images of Ni/TiO<sub>2</sub>-form-A-II samples before and after reaction.

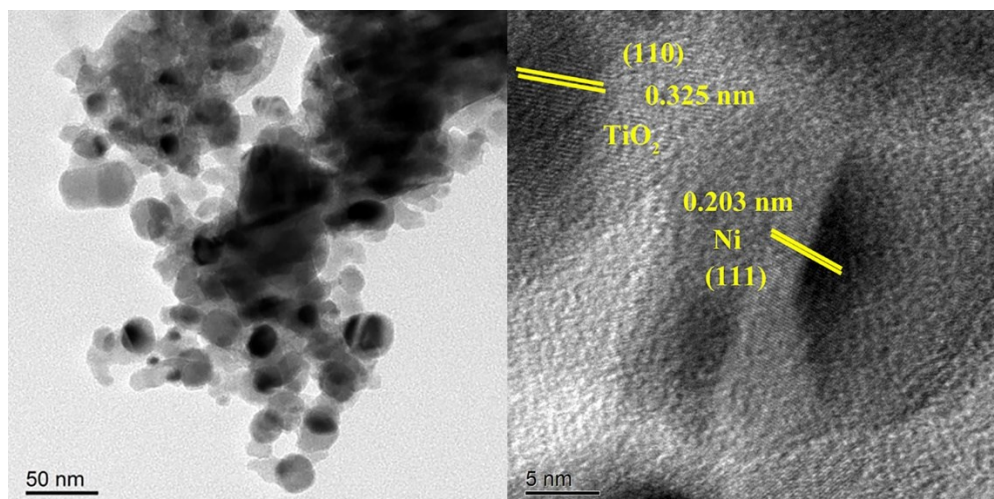

**Figure S16.** The TEM and HRTEM images of Ni/TiO<sub>2</sub>-form-A-II sample after reaction.

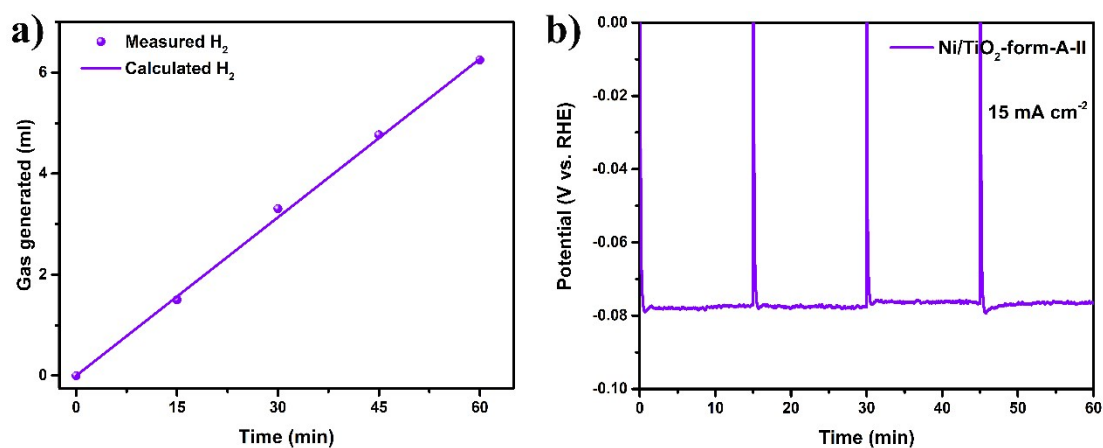

**Figure S17.** The amount of H<sub>2</sub> generated during the reaction of Ni/TiO<sub>2</sub>-form-A-II sample and the potential-time curve (without iR correction) at the current density of 15 mA cm<sup>-2</sup> over a sampling period of 1 hour.

**Table S1.** The performance comparison of Ni/TiO<sub>2</sub>-form-A-II electrode with other HER materials

| Catalyst                                           | Overpotential at 10 mA cm <sup>-2</sup> (mV) | Tafel slope (mV dec <sup>-1</sup> ) | Electrolyte                         | Source    |
|----------------------------------------------------|----------------------------------------------|-------------------------------------|-------------------------------------|-----------|
| Ni/TiO <sub>2</sub> -form-A-II                     | 46                                           | 41.8                                | 1M KOH                              | This work |
| Mo <sub>2</sub> C-MoOx                             | 60                                           | 53                                  | 1M HClO <sub>4</sub>                | [1]       |
| NiMoOP                                             | 91                                           | 55.9                                | 1M KOH                              | [2]       |
| Co-NC                                              | 157                                          | 109                                 | 1M KOH                              | [3]       |
| Ni-NiO-CNT                                         | ≈90                                          | 82                                  | 1M KOH                              | [4]       |
| Co-Co <sub>3</sub> O <sub>4</sub>                  | 90                                           | 90                                  | 1M KOH                              | [5]       |
| Ni-V <sub>2</sub> O <sub>3</sub>                   | 61                                           | 79.7                                | 1M KOH                              | [6]       |
| N-CoP <sub>2</sub>                                 | 38                                           | 46                                  | 0.5M H <sub>2</sub> SO <sub>4</sub> | [7]       |
| Ni-VC                                              | 138                                          | 62                                  | 0.5M H <sub>2</sub> SO <sub>4</sub> | [8]       |
| CoP                                                | 122                                          | 54.8                                | 0.5M H <sub>2</sub> SO <sub>4</sub> | [9]       |
| MOF derived Ni                                     | 61                                           | 71                                  | 1M KOH                              | [10]      |
| Ni <sub>3</sub> N-C                                | 115                                          | 52.1                                | 1M KOH                              | [11]      |
| Ni <sub>2</sub> P-NiP <sub>2</sub>                 | 59.7                                         | 58.8                                | 1M KOH                              | [12]      |
| MoS <sub>2</sub> -CoNi <sub>2</sub> S <sub>4</sub> | 78                                           | 67                                  | 1M KOH                              | [13]      |
| Al-CoS <sub>2</sub>                                | 86                                           | 62.47                               | 0.5M H <sub>2</sub> SO <sub>4</sub> | [14]      |
| Ni-C                                               | 37                                           | 42                                  | 1M KOH                              | [15]      |
| Co-NiS <sub>2</sub>                                | 80                                           | 43                                  | 1M KOH                              | [16]      |

**Table S2.** Comparison of HER performance between our sample and the non-precious metal Ni materials reported in literatures in alkaline solution

| <b>Catalyst</b>                      | <b><math>\eta_{10}</math>(mV)</b> | <b>Tafel slope<br/>(mV<br/>decade<sup>-1</sup>)</b> | <b>Electrolyte</b> | <b>Source</b>    |
|--------------------------------------|-----------------------------------|-----------------------------------------------------|--------------------|------------------|
| <b>Ni/TiO<sub>2</sub>-form-A-II</b>  | <b>46</b>                         | <b>41.8</b>                                         | <b>1 M KOH</b>     | <b>This work</b> |
| <b>Ni@CeO<sub>2</sub></b>            | <b>91</b>                         | <b>51</b>                                           | <b>1 M KOH</b>     | <b>[17]</b>      |
| <b>Ni/NiO/CNT</b>                    | <b>80</b>                         | <b>82</b>                                           | <b>1 M KOH</b>     | <b>[4]</b>       |
| <b>Ni-Mo</b>                         | <b>92</b>                         | <b>76</b>                                           | <b>1 M KOH</b>     | <b>[18]</b>      |
| <b>Ni@C</b>                          | <b>37</b>                         | <b>57</b>                                           | <b>1 M KOH</b>     | <b>[15]</b>      |
| <b>Ni@NiO</b>                        | <b>79</b>                         | <b>119</b>                                          | <b>1 M KOH</b>     | <b>[19]</b>      |
| <b>Ni@Ni(OH)<sub>2</sub></b>         | <b>68</b>                         | <b>97</b>                                           | <b>1 M KOH</b>     | <b>[20]</b>      |
| <b>Ni/V<sub>2</sub>O<sub>3</sub></b> | <b>61</b>                         | <b>79.7</b>                                         | <b>1 M KOH</b>     | <b>[6]</b>       |
| <b>Ni@MoS<sub>2</sub></b>            | <b>98</b>                         | <b>75</b>                                           | <b>1 M KOH</b>     | <b>[21]</b>      |
| <b>Ni@Mo<sub>2</sub>C</b>            | <b>179</b>                        | <b>101</b>                                          | <b>1 M KOH</b>     | <b>[22]</b>      |
| <b>Ni-Ni(OH)<sub>2</sub></b>         | <b>57</b>                         | <b>44.8</b>                                         | <b>1 M KOH</b>     | <b>[23]</b>      |
| <b>NiCu</b>                          | <b>184</b>                        | <b>84</b>                                           | <b>1 M KOH</b>     | <b>[24]</b>      |
| <b>Ni-NiMoN</b>                      | <b>37</b>                         | <b>51</b>                                           | <b>1 M KOH</b>     | <b>[25]</b>      |
| <b>NiW-W</b>                         | <b>59</b>                         | <b>52</b>                                           | <b>1 M KOH</b>     | <b>[26]</b>      |
| <b>Ni-Ni<sub>3</sub>C</b>            | <b>98</b>                         | <b>88.5</b>                                         | <b>1 M KOH</b>     | <b>[27]</b>      |
| <b>Ni-Fe<sub>3</sub>C</b>            | <b>93</b>                         | <b>97</b>                                           | <b>1 M KOH</b>     | <b>[28]</b>      |
| <b>NiCo</b>                          | <b>72</b>                         | <b>57</b>                                           | <b>1 M KOH</b>     | <b>[29]</b>      |



## References

- [1] L. He, W. Zhang, Q. Mo, W. Huang, L. Yang, Q. Gao, Molybdenum Carbide-Oxide Heterostructures: In Situ Surface Reconfiguration toward Efficient Electrocatalytic Hydrogen Evolution, *Angew. Chem. Int. Ed.*, 59 (2020) 3544-3548.
- [2] J. Balamurugan, T.T. Nguyen, V. Aravindan, N.H. Kim, J.H. Lee, Highly reversible water splitting cell building from hierarchical 3D nickel manganese oxyphosphide nanosheets, *Nano Energy*, 69 (2020) 104432.
- [3] H. Huang, S. Zhou, C. Yu, H. Huang, J. Zhao, L. Dai, J. Qiu, Rapid and energy-efficient microwave pyrolysis for high-yield production of highly-active bifunctional electrocatalysts for water splitting, *Energy Environ. Sci.*, 13 (2020) 545-553.
- [4] M. Gong, W. Zhou, M.-C. Tsai, J. Zhou, M. Guan, M.-C. Lin, B. Zhang, Y. Hu, D.-Y. Wang, J. Yang, S.J. Pennycook, B.-J. Hwang, H. Dai, Nanoscale nickel oxide/nickel heterostructures for active hydrogen evolution electrocatalysis, *Nat. Commun.*, 5 (2014) 4695.
- [5] X. Yan, L. Tian, M. He, X. Chen, Three-Dimensional Crystalline/Amorphous Co/Co<sub>3</sub>O<sub>4</sub> Core/Shell Nanosheets as Efficient Electrocatalysts for the Hydrogen Evolution Reaction, *Nano Lett.*, 15 (2015) 6015-6021.
- [6] M. Ming, Y. Ma, Y. Zhang, L.-B. Huang, L. Zhao, Y.-Y. Chen, X. Zhang, G. Fan, J.-S. Hu, 3D nanoporous Ni/V<sub>2</sub>O<sub>3</sub> hybrid nanoplate assemblies for highly efficient electrochemical hydrogen evolution, *J. Mater. Chem. A*, 6 (2018) 21452-21457.

- [7] J. Cai, Y. Song, Y. Zang, S. Niu, Y. Wu, Y. Xie, X. Zheng, Y. Liu, Y. Lin, X. Liu, G. Wang, Y. Qian, N-induced lattice contraction generally boosts the hydrogen evolution catalysis of P-rich metal phosphides, *Sci Adv*, 6 (2020) eaaw8113.
- [8] L. Peng, J. Shen, L. Zhang, Y. Wang, R. Xiang, J. Li, L. Li, Z. Wei, Graphitized carbon-coated vanadium carbide nanoboscages modified by nickel with enhanced electrocatalytic activity for hydrogen evolution in both acid and alkaline solutions, *J. Mater. Chem. A*, 5 (2017) 23028-23034.
- [9] L. Ji, J. Wang, X. Teng, T.J. Meyer, Z. Chen, CoP Nanoframes as Bifunctional Electrocatalysts for Efficient Overall Water Splitting, *ACS Catal*, 10 (2020) 412-419.
- [10] T. Wang, Q. Zhou, X. Wang, J. Zheng, X. Li, MOF-derived surface modified Ni nanoparticles as an efficient catalyst for the hydrogen evolution reaction, *J. Mater. Chem. A*, 3 (2015) 16435-16439.
- [11] T. Liu, M. Li, C. Jiao, M. Hassan, X. Bo, M. Zhou, H.-L. Wang, Design and synthesis of integrally structured Ni<sub>3</sub>N nanosheets/carbon microfibers/Ni<sub>3</sub>N nanosheets for efficient full water splitting catalysis, *J. Mater. Chem. A*, 5 (2017) 9377-9390.
- [12] T. Liu, A. Li, C. Wang, W. Zhou, S. Liu, L. Guo, Interfacial Electron Transfer of Ni<sub>2</sub>P–NiP<sub>2</sub> Polymorphs Inducing Enhanced Electrochemical Properties, *Adv. Mater*, 30 (2018) 1803590.
- [13] J. Hu, C. Zhang, P. Yang, J. Xiao, T. Deng, Z. Liu, B. Huang, M.K.H. Leung, S. Yang, Kinetic-Oriented Construction of MoS<sub>2</sub> Synergistic Interface to Boost pH-Universal Hydrogen Evolution, *Adv. Funct. Mater*, 30 (2020) 1908520.

- [14] M. Wang, W. Zhang, F. Zhang, Z. Zhang, B. Tang, J. Li, X. Wang, Theoretical Expectation and Experimental Implementation of In Situ Al-Doped CoS<sub>2</sub> Nanowires on Dealloying-Derived Nanoporous Intermetallic Substrate as an Efficient Electrocatalyst for Boosting Hydrogen Production, *ACS Catal*, 9 (2019) 1489-1502.
- [15] H. Sun, Y. Lian, C. Yang, L. Xiong, P. Qi, Q. Mu, X. Zhao, J. Guo, Z. Deng, Y. Peng, A hierarchical nickel–carbon structure templated by metal–organic frameworks for efficient overall water splitting, *Energy Environ. Sci*, 11 (2018) 2363-2371.
- [16] J. Yin, J. Jin, H. Zhang, M. Lu, Y. Peng, B. Huang, P. Xi, C.-H. Yan, Atomic Arrangement in Metal-Doped NiS<sub>2</sub> Boosts the Hydrogen Evolution Reaction in Alkaline Media, *Angew. Chem. Int. Ed*, 58 (2019) 18676-18682.
- [17] Z. Weng, W. Liu, L.-C. Yin, R. Fang, M. Li, E.I. Altman, Q. Fan, F. Li, H.-M. Cheng, H. Wang, Metal/Oxide Interface Nanostructures Generated by Surface Segregation for Electrocatalysis, *Nano Lett*, 15 (2015) 7704-7710.
- [18] J. Tian, N. Cheng, Q. Liu, X. Sun, Y. He, A.M. Asiri, Self-supported NiMo hollow nanorod array: an efficient 3D bifunctional catalytic electrode for overall water splitting, *J. Mater. Chem. A*, 3 (2015) 20056-20059.
- [19] J. Wang, S. Mao, Z. Liu, Z. Wei, H. Wang, Y. Chen, Y. Wang, Dominating Role of NiO on the Interface of Ni/NiO for Enhanced Hydrogen Evolution Reaction, *ACS Appl. Mater. Interfaces*, 9 (2017) 7139-7147.
- [20] Z. Xing, L. Gan, J. Wang, X. Yang, Experimental and theoretical insights into sustained water splitting with an electrodeposited nanoporous nickel hydroxide@nickel film as an electrocatalyst, *J. Mater. Chem. A*, 5 (2017) 7744-7748.

- [21] Q. Wang, Z.L. Zhao, S. Dong, D. He, M.J. Lawrence, S. Han, C. Cai, S. Xiang, P. Rodriguez, B. Xiang, Z. Wang, Y. Liang, M. Gu, Design of active nickel single-atom decorated MoS<sub>2</sub> as a pH-universal catalyst for hydrogen evolution reaction, *Nano Energy*, 53 (2018) 458-467.
- [22] Z.-Y. Yu, Y. Duan, M.-R. Gao, C.-C. Lang, Y.-R. Zheng, S.-H. Yu, A one-dimensional porous carbon-supported Ni/Mo<sub>2</sub>C dual catalyst for efficient water splitting, *Chem. Sci*, 8 (2017) 968-973.
- [23] J. Hu, S. Li, Y. Li, J. Wang, Y. Du, Z. Li, X. Han, J. Sun, P. Xu, A crystalline–amorphous Ni–Ni(OH)<sub>2</sub> core–shell catalyst for the alkaline hydrogen evolution reaction, *J. Mater. Chem. A*, 8 (2020) 23323-23329.
- [24] M.A. Ahsan, A.R. Puente Santiago, Y. Hong, N. Zhang, M. Cano, E. Rodriguez-Castellon, L. Echegoyen, S.T. Sreenivasan, J.C. Noveron, Tuning of Trifunctional NiCu Bimetallic Nanoparticles Confined in a Porous Carbon Network with Surface Composition and Local Structural Distortions for the Electrocatalytic Oxygen Reduction, Oxygen and Hydrogen Evolution Reactions, *J. Am. Chem. Soc.*, 142 (2020) 14688-14701.
- [25] L. Shang, Y. Zhao, X.-Y. Kong, R. Shi, G.I.N. Waterhouse, L. Wen, T. Zhang, Underwater superaerophobic Ni nanoparticle-decorated nickel–molybdenum nitride nanowire arrays for hydrogen evolution in neutral media, *Nano Energy*, 78 (2020) 105375.
- [26] Y.-K. Li, G. Zhang, H. Huang, W.-T. Lu, F.-F. Cao, Z.-G. Shao, Ni<sub>17</sub>W<sub>3</sub>–W Interconnected Hybrid Prepared by Atmosphere- and Thermal-Induced Phase



Separation for Efficient Electrocatalysis of Alkaline Hydrogen Evolution, *Small*, 16 (2020) 2005184.

[27] P. Wang, R. Qin, P. Ji, Z. Pu, J. Zhu, C. Lin, Y. Zhao, H. Tang, W. Li, S. Mu, Synergistic Coupling of Ni Nanoparticles with Ni<sub>3</sub>C Nanosheets for Highly Efficient Overall Water Splitting, *Small*, 16 (2020) 2001642.

[28] C. Yang, R. Zhao, H. Xiang, J. Wu, W. Zhong, W. Li, Q. Zhang, N. Yang, X. Li, Ni-Activated Transition Metal Carbides for Efficient Hydrogen Evolution in Acidic and Alkaline Solutions, *Adv. Energy Mater*, 10 (2020) 2002260.

[29] X. Tan, S. Geng, Y. Ji, Q. Shao, T. Zhu, P. Wang, Y. Li, X. Huang, Closest Packing Polymorphism Interfaced Metastable Transition Metal for Efficient Hydrogen Evolution, *Adv. Mater*, 32 (2020) 2002857.
